# Supplementary material for: Impact of Salvage Surgery following Colonic Endoscopic Polypectomy for Patients with Invasive Neoplasia
Source: MDPI journal article supplement (doi:10.3390/curroncol29050255), 2022-04-29
Supplement: s1 [file s1]

Article

# Impact of Salvage Surgery Following Colonic Endoscopic Polypectomy for Patients with Invasive Neoplasia

Xiangzhou Tan, Markus Quante, Zihua Chen, Zhikang Chen, Alfred Königsrainer and Dörte Wichmann

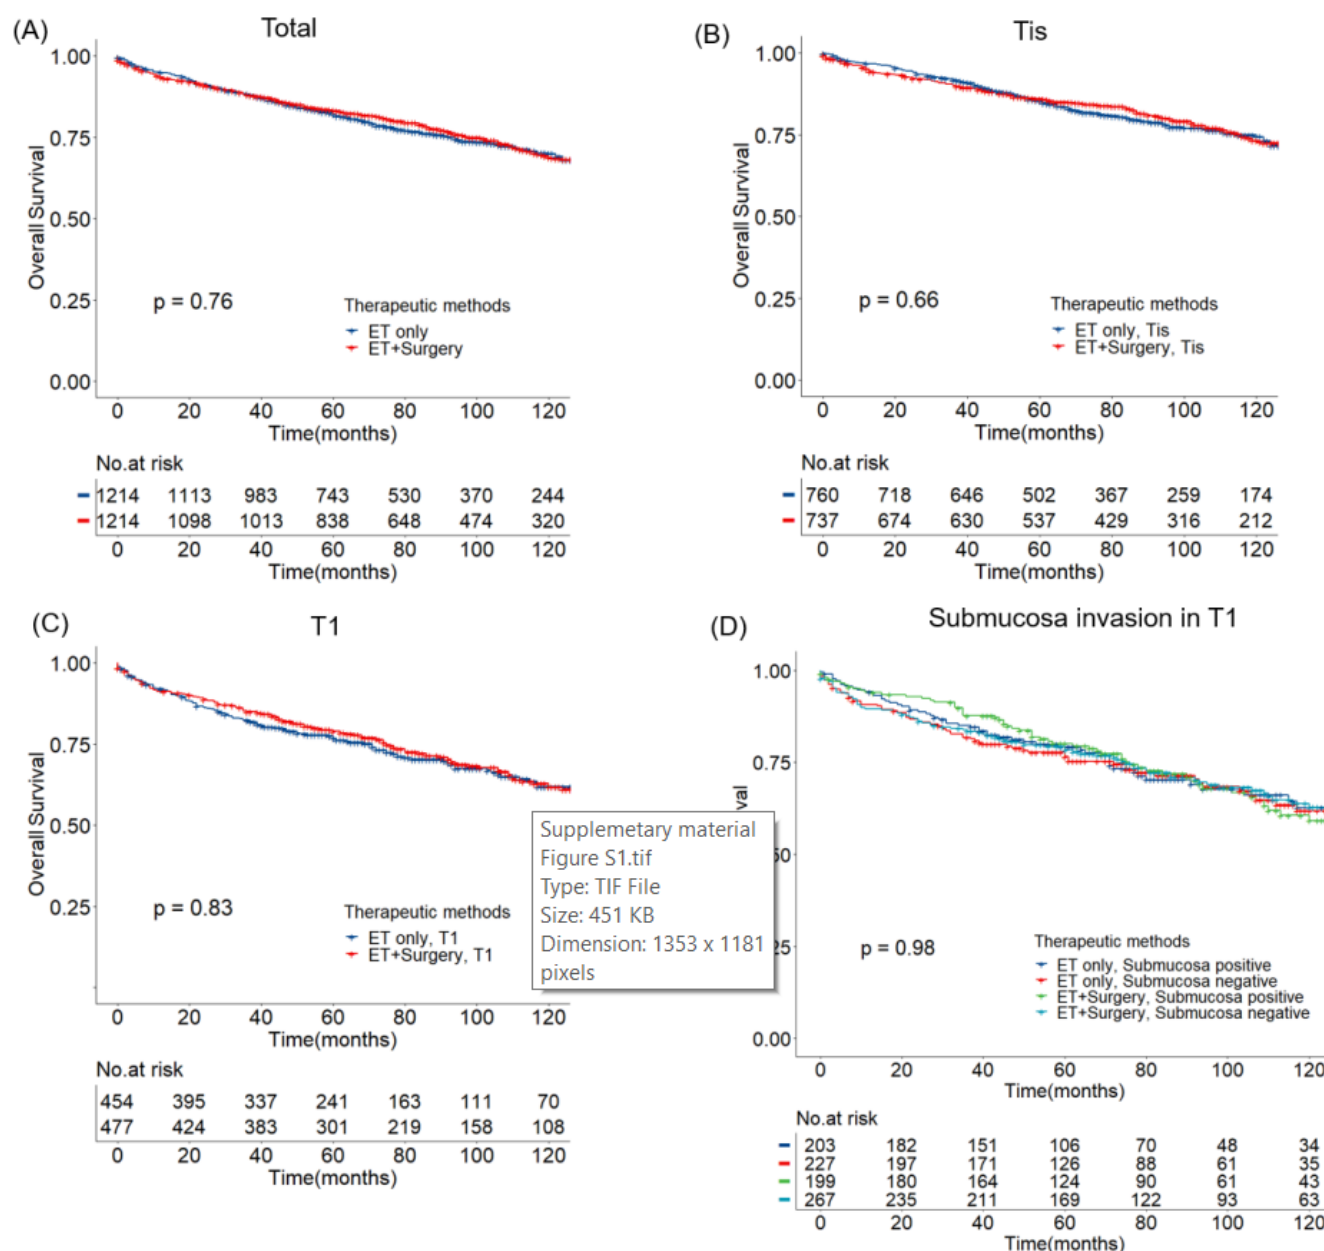

**Figure S1.** Kaplan-Meier overall survival plots in patients underwent endoscopic removal of invasive neoplasia. (A) All patients; (B) Patients with intramucosal carcinoma (Tis); (C) Patients with submucosal carcinoma (T1). (D) Patients with or without submucosa invasion.

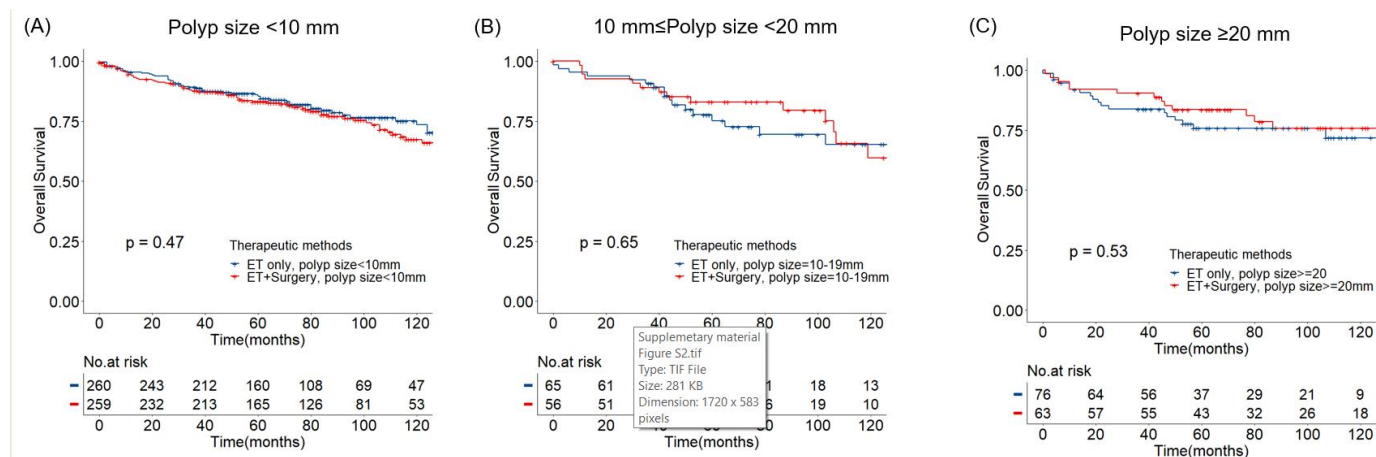

**Figure S2.** Kaplan-Meier overall survival plots in patients underwent endoscopic removal of invasive neo-plasia. (A) Invasive polyp size less than 10 mm; (B) Invasive polyp size between 10 mm and 20 mm; (C) Invasive polyp size larger than 20 mm.
